# Supplementary material for: HCMV triggers frequent and persistent UL40-specific unconventional HLA-E-restricted CD8 T-cell responses with potential autologous and allogeneic peptide recognition
Source: PubMed Central journal article supplement (PMC5945056; doi:10.1371/journal.ppat.1007041), 2018-04-30
Supplement: ppat.1007041.s001.pdf [file ppat.1007041.s001.pdf]

**S1 Table**

|                                                           | HLA-E <sub>UL40</sub> CD8 T-cell response |                     |                     |
|-----------------------------------------------------------|-------------------------------------------|---------------------|---------------------|
|                                                           | -<br>(n=57)                               | +<br>(n=23)         | p-value             |
| Serum Creatinine at M12<br>[ $\mu$ mol/L; median (Q1-Q3)] | 137<br>(118-175)                          | 134<br>(96-166)     | 0.3371 <sup>1</sup> |
| Proteinuria at M12<br>[g/24h; median (Q1-Q3)]             | 0.23<br>(0.11-0.46)                       | 0.28<br>(0.12-0.44) | 0.7133 <sup>1</sup> |

<sup>1</sup> Mann Whitney test
