# Supplementary material for: HCMV triggers frequent and persistent UL40-specific unconventional HLA-E-restricted CD8 T-cell responses with potential autologous and allogeneic peptide recognition
Source: PubMed Central journal article supplement (PMC5945056; doi:10.1371/journal.ppat.1007041), 2018-04-30

# S1 Fig

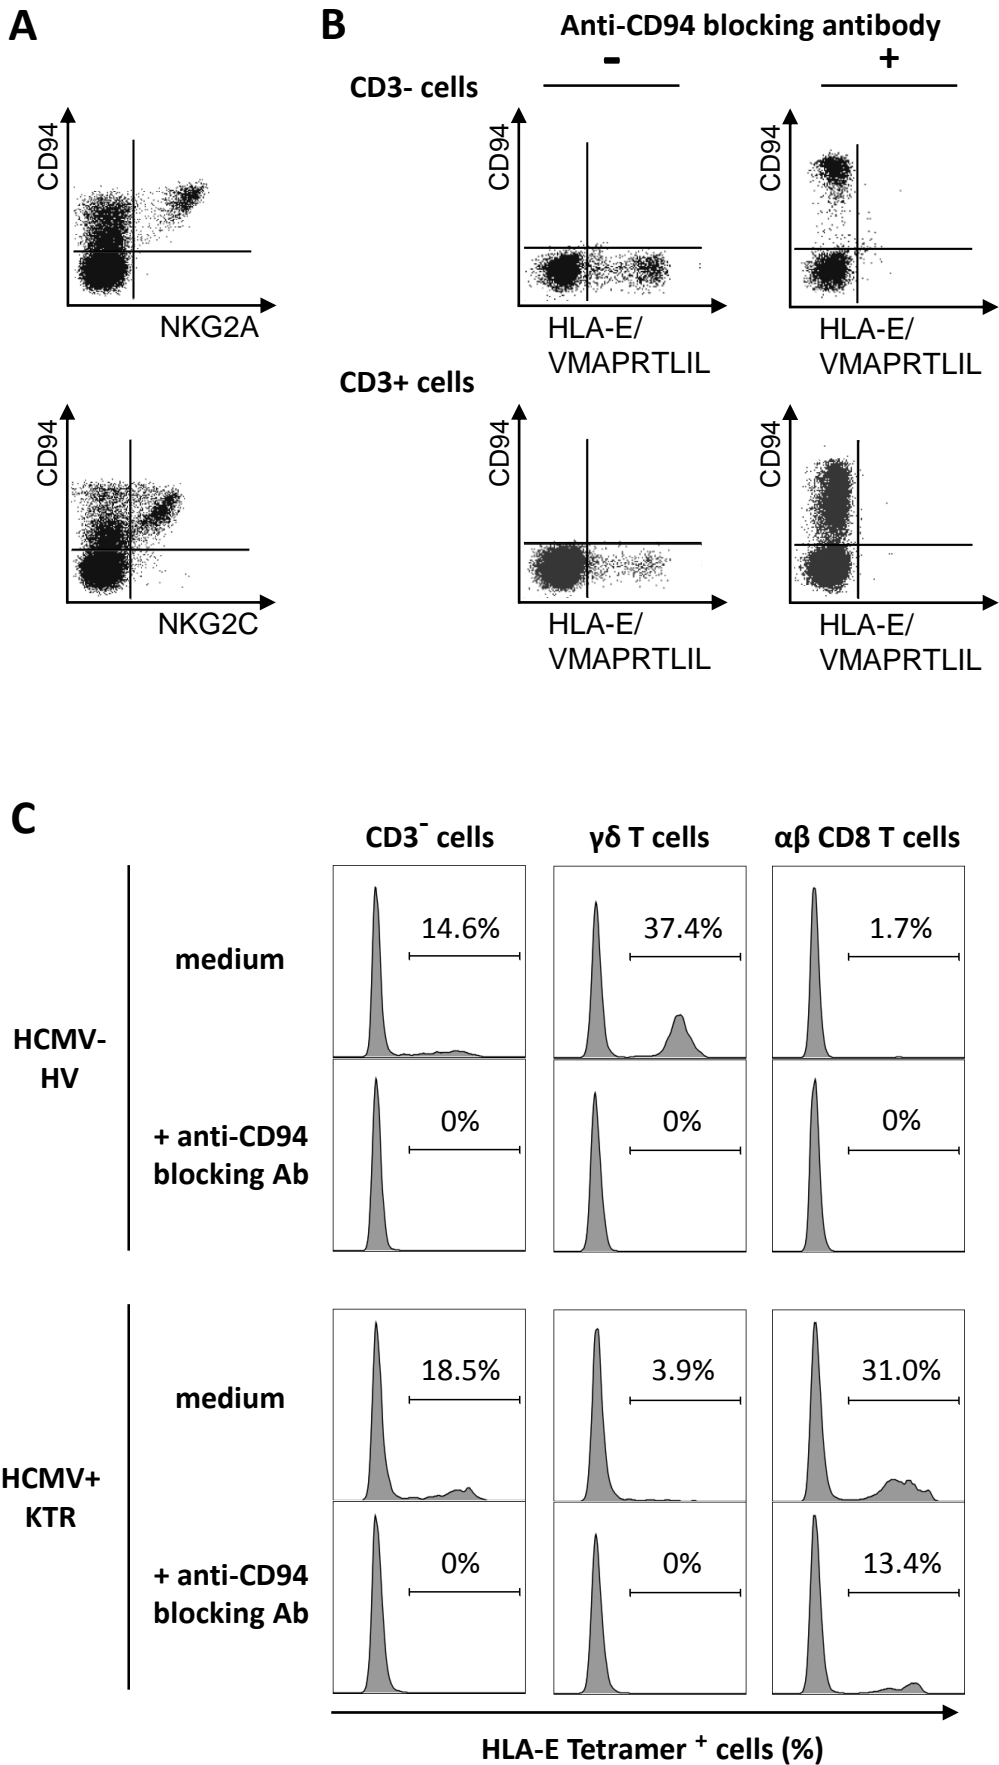

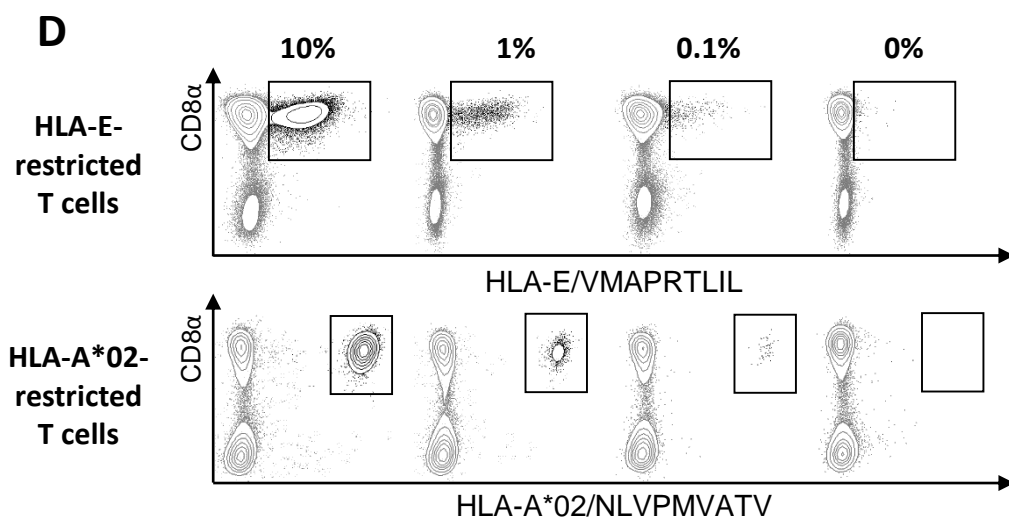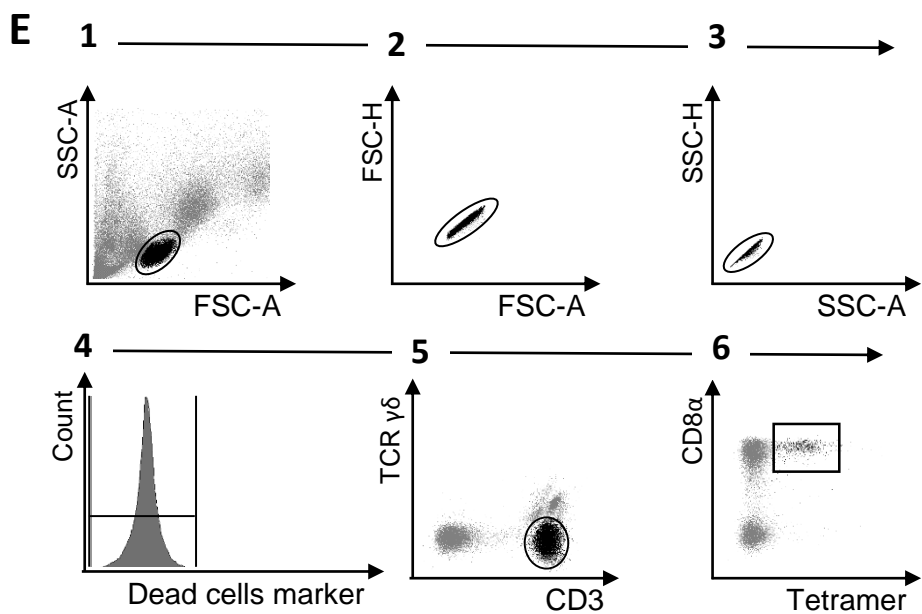

Supplement: ppat.1007041.s002.pdf [file ppat.1007041.s002.pdf]
